# Supplementary material for: Identification and Characterization of Three New Antimicrobial Peptides from the Marine Mollusk Nerita versicolor (Gmelin, 1791)
Source: MDPI journal article supplement (doi:10.3390/ijms24043852), 2023-02-14
Supplement: s1 [file s1]

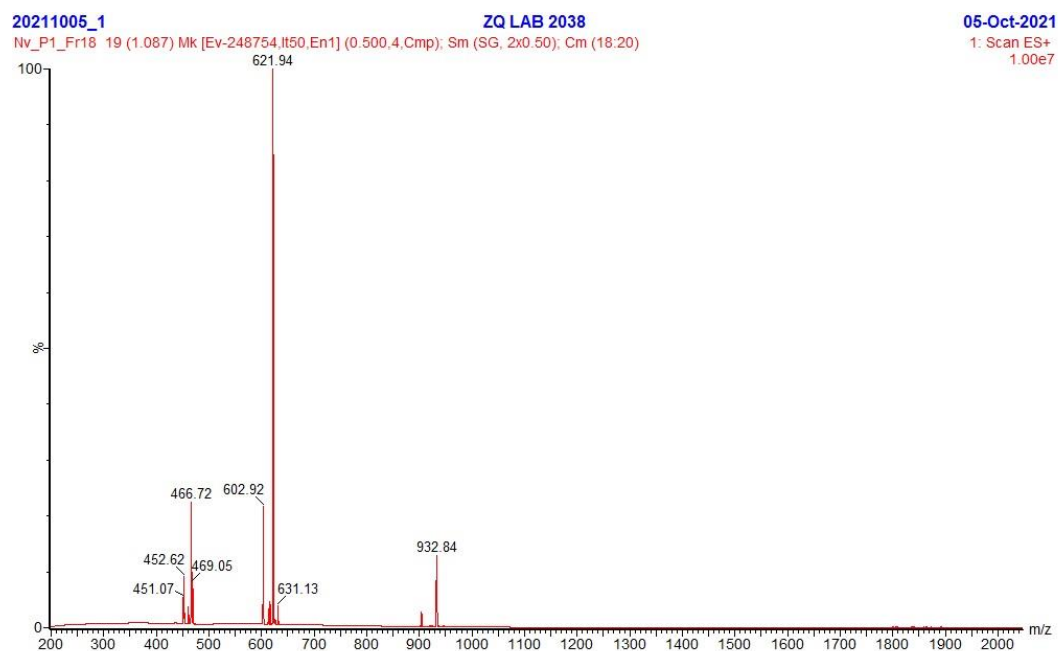

ESI-MS spectra of the synthetic Nv-p1, the 4+, 3+ and 2+ ion species have been detected.

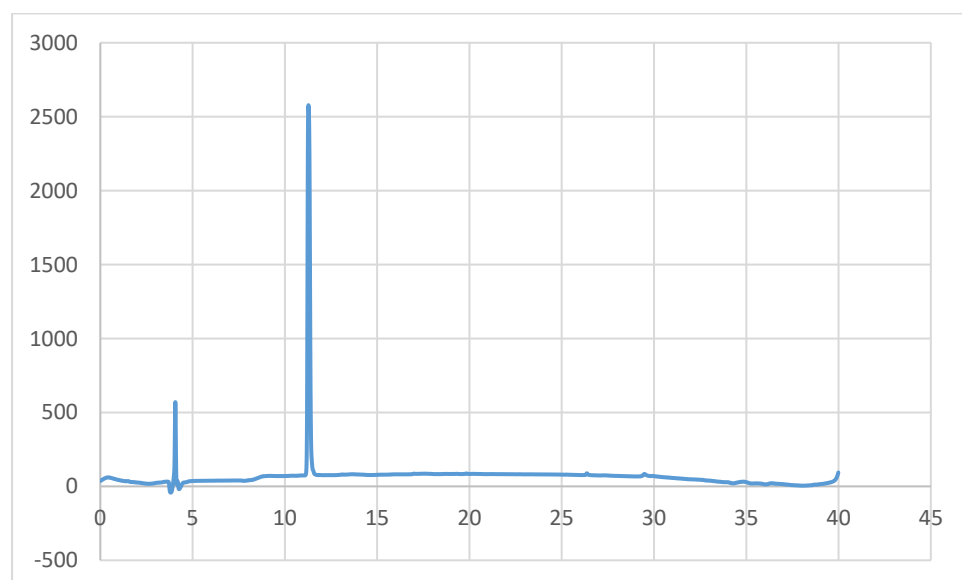

Analytical RP-HPLC of synthetic Nv-p1.

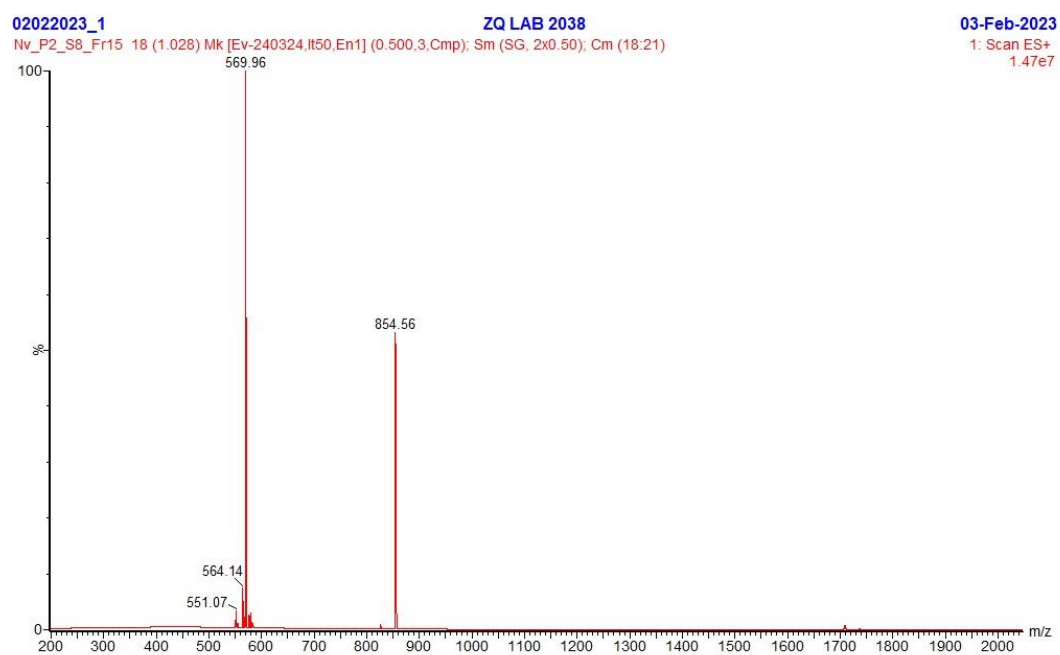

ESI-MS spectra of the synthetic Nv-p2, the 3+ and 2+ ion species have been detected.

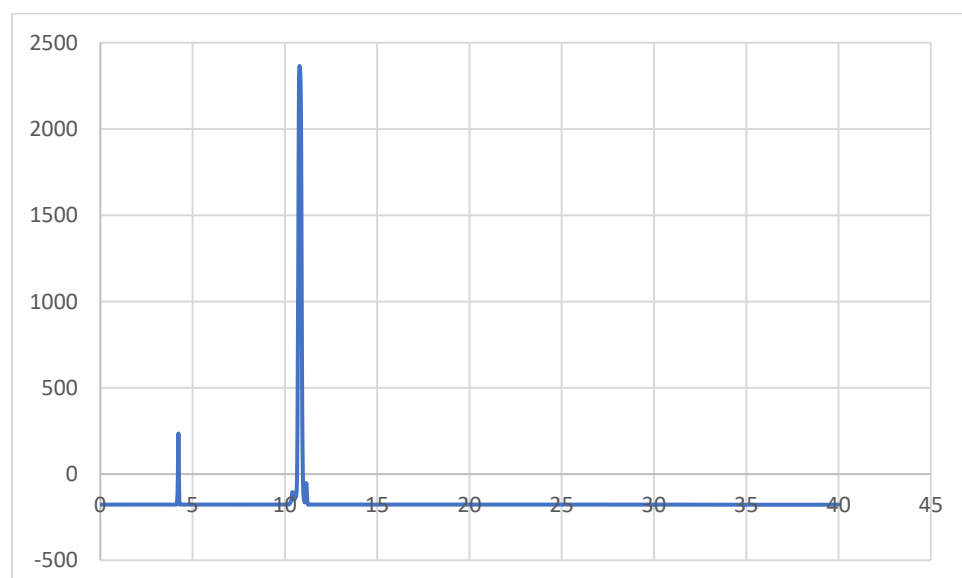

Analytical RP-HPLC of synthetic Nv-p2.

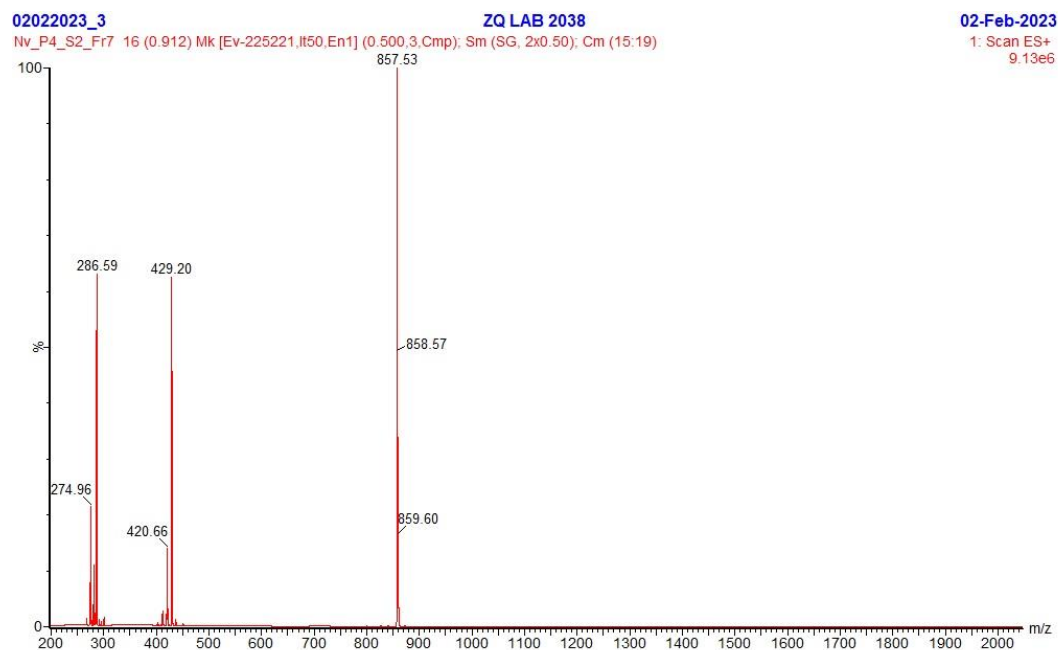

ESI-MS spectra of the synthetic Nv-p3, the 3+, 2+ and 1+ ion species have been detected.

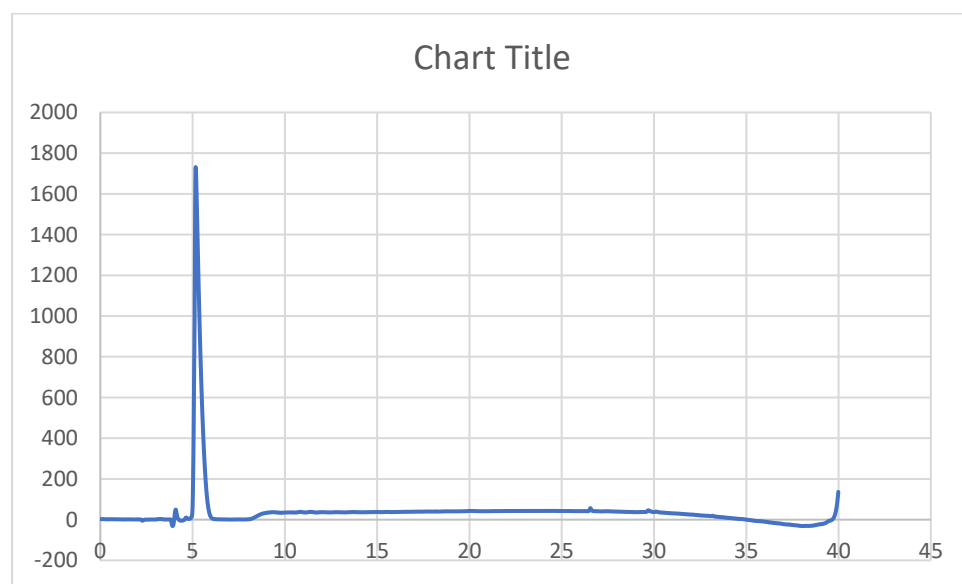

Analytical RP-HPLC of synthetic Nv-p3.
